# Supplementary material
Source: ML conference proceedings conference paper supplement (https://openaccess.thecvf.com/content/cvpr_2017/html/Bai_Scalable_Person_Re-Identification_2017_CVPR_paper.html)
Supplement: Supplementary file 1 [file Bai_Scalable_Person_Re-Identification_2017_CVPR_supplemental.pdf]

# Supplementary material for “Scalable Person Re-identification on Supervised Smoothed Manifold”

Song Bai<sup>1</sup>, Xiang Bai<sup>1</sup>, Qi Tian<sup>2</sup>

<sup>1</sup>Huazhong University of Science and Technology, <sup>2</sup>University of Texas at San Antonio

{songbai,xbai}@hust.edu.cn, qi.tian@utsa.edu

| Methods      | Ref      | r=1          | r=10         | r=20         |
|--------------|----------|--------------|--------------|--------------|
| SCNCD [7]    | ECCV2014 | 41.60        | 79.40        | 87.80        |
| Semantic [6] | CVPR2015 | 44.90        | 77.50        | 86.70        |
| CSL [5]      | ICCV2015 | 44.40        | 82.20        | 89.80        |
| XQDA [1]     | CVPR2015 | 61.38        | 91.02        | 95.33        |
| TMA [2]      | ECCV2016 | 52.89        | 85.78        | 93.33        |
| LSSCDL [8]   | CVPR2016 | 60.49        | 88.58        | 93.60        |
| GOG [3]      | CVPR2016 | <b>68.40</b> | <b>94.50</b> | <b>97.80</b> |
| SSM (Ours)   |          | <b>72.98</b> | <b>96.76</b> | <b>99.11</b> |

Table 1. The comparison with state-of-the-art on PRID450S.

The document contains the supplementary materials for “Scalable Person Re-identification on Supervised Smoothed Manifold”. Due to the space limitation, the comparison with state-of-the-art on PRID450S dataset [4] has to be simplified in the main paper. The only goal of this document is to present this comparison in Table 1. As can be seen, SSM sets a new state-of-the-art performance on this dataset.

## References

- [1] S. Liao, Y. Hu, X. Zhu, and S. Z. Li. Person re-identification by local maximal occurrence representation and metric learning. In *CVPR*, pages 2197–2206, 2015. 1
- [2] N. Martinel, A. Das, C. Micheloni, and A. K. Roy-Chowdhury. Temporal model adaptation for person re-identification. In *ECCV*, pages 858–877, 2016. 1
- [3] T. Matsukawa, T. Okabe, E. Suzuki, and Y. Sato. Hierarchical gaussian descriptor for person re-identification. In *CVPR*, pages 1363–1372, 2016. 1
- [4] P. M. Roth, M. Hirzer, M. Koestinger, C. Beleznai, and H. Bischof. Mahalanobis distance learning for person re-identification. In *Person Re-Identification*, pages 247–267. 2014. 1
- [5] Y. Shen, W. Lin, J. Yan, M. Xu, J. Wu, and J. Wang. Person re-identification with correspondence structure learning. In *ICCV*, pages 3200–3208, 2015. 1
- [6] Z. Shi, T. M. Hospedales, and T. Xiang. Transferring a semantic representation for person re-identification and search. In *CVPR*, pages 4184–4193, 2015. 1

- [7] Y. Yang, J. Yang, J. Yan, S. Liao, D. Yi, and S. Z. Li. Salient color names for person re-identification. In *ECCV*, pages 536–551, 2014. 1
- [8] Y. Zhang, B. Li, H. Lu, A. Irie, and X. Ruan. Sample-specific svm learning for person re-identification. In *CVPR*, 2016. 1
